# Supplementary material for: Outflow Boundary Conditions for Blood Flow in Arterial Trees
Source: PubMed Central journal article supplement (PMC4441455; doi:10.1371/journal.pone.0128597), 2015-05-22
Supplement: pone.0128597.s001.pdf [file pone.0128597.s001.pdf]

## The analytical derivation of the characteristic resistance, $R_1$

At the inlet of the root vessel of a truncated arterial crown, the impedance with the Womersley velocity profile is

$$Z(0, \omega) = \frac{\lambda}{i\omega C} \frac{i\omega C Z(L, \omega) \cosh(\lambda L) + \lambda \sinh(\lambda L)}{\lambda \cosh(\lambda L) + i\omega C \sinh(\lambda L) Z(L, \omega)}, \quad (1)$$

where  $Z(L, \omega)$  is a known impedance at the outlet of the root vessel and  $\lambda = \sqrt{\frac{-\rho C \omega^2}{A_0(1-F_J)}}$  is the wave number as shown in the main text. According to the relation between the trigonometric functions and the hyperbolic functions, equation (1) can be rewritten as

$$Z(0, \omega) = \frac{\lambda}{\omega C} \frac{\frac{\omega C}{\lambda} Z(L, \omega) - \tan(i\lambda L)}{1 + \frac{\omega C}{\lambda} Z(L, \omega) \tan(i\lambda L)} = \frac{\lambda}{\omega C} \tan(\phi - i\lambda L), \quad (2)$$

where  $\phi$  is defined by  $\tan \phi = \frac{\omega C Z(L, \omega)}{\lambda}$ . Let  $a = \text{Re}(\phi - i\lambda L)$ ,  $b = \text{Im}(\phi - i\lambda L)$ , then we have

$$Z(0, \omega) = \frac{\lambda}{\omega C} \tan(a + ib) = \frac{\lambda}{\omega C} \frac{\tan a + i \tanh b}{1 - i \tan a \tanh b}. \quad (3)$$

When the frequency  $\omega$  is large, the Womersley number,  $W = r_0 \sqrt{\omega \rho / \mu}$ , is also large, therefore, we have the following approximation:

$$F_J(W) \sim \frac{2}{W i^{0.5}} \left(1 + \frac{1}{2W}\right), \quad \lambda \sim \sqrt{\frac{\rho C}{A_0}} \left(-i\omega + \sqrt{\frac{\omega \gamma}{\rho}} \frac{1+i}{4}\right), \quad (4)$$

where  $\gamma = \frac{8\pi\mu}{A_0}$ . Then we have  $\text{Im}(i\lambda L) \rightarrow \infty$  and  $|b| \rightarrow \infty$  as  $\omega \rightarrow \infty$ . Thus,  $\tanh b \rightarrow \frac{|b|}{b}$  and  $\frac{\tan(a) + i \tanh(b)}{1 - i \tan(a) \tanh(b)} \rightarrow i$  as  $\omega \rightarrow \infty$ . Finally, we can obtain

$$R_1 = \lim_{\omega \rightarrow \infty} Z(0, \omega) = \sqrt{\frac{\rho}{A_0 C}}. \quad (5)$$

With the expression of the pulse wave speed,  $c = \sqrt{\frac{2Eh}{3\rho r_0(x)}}$ , and the area compliance,  $C = \frac{3A_0 r_0}{2Eh}$ , in the main text, we can also arrive at

$$R_1 = \frac{\rho c}{A_0}. \quad (6)$$
