# Supplementary material for: Outflow Boundary Conditions for Blood Flow in Arterial Trees
Source: PubMed Central journal article supplement (PMC4441455; doi:10.1371/journal.pone.0128597), 2015-05-22

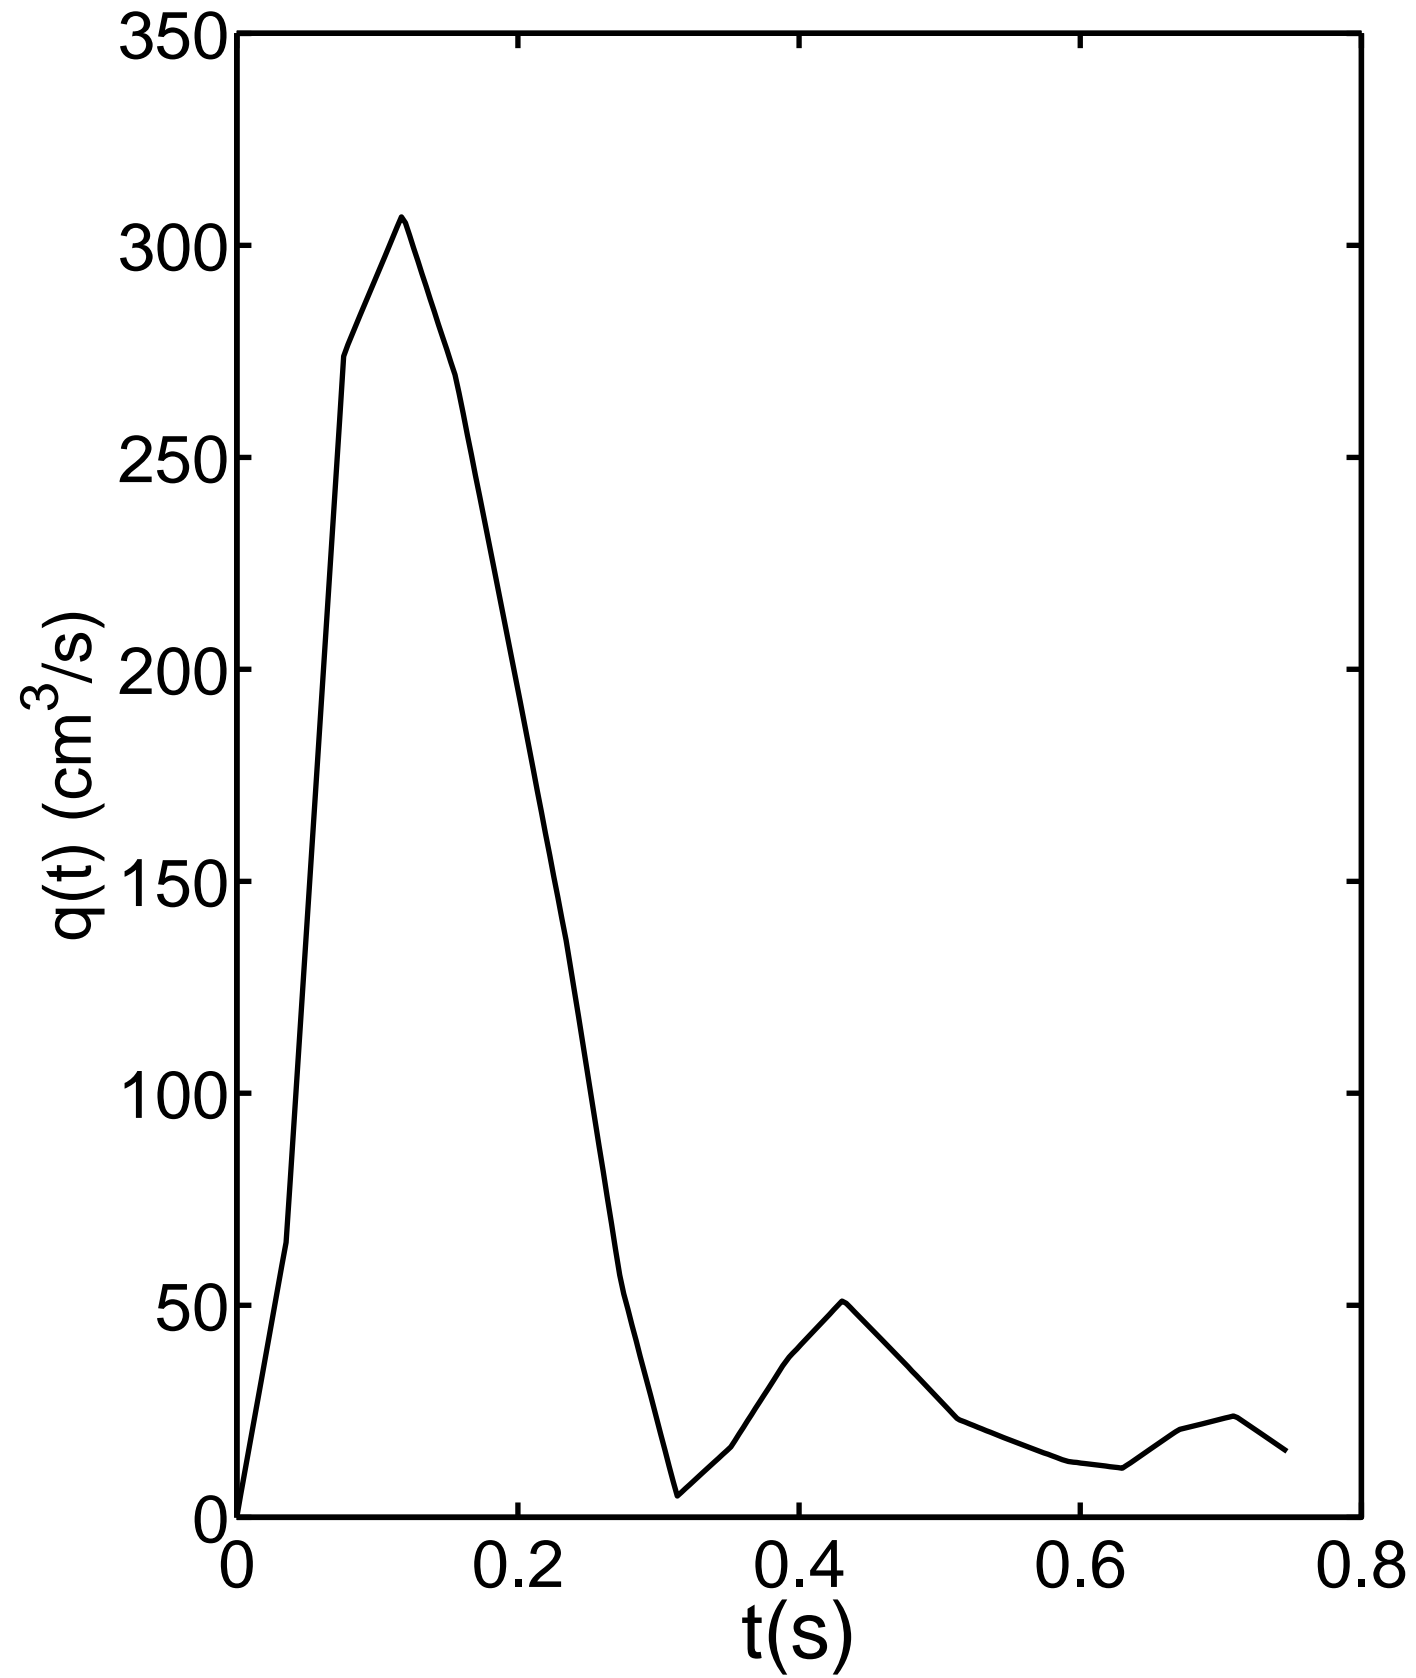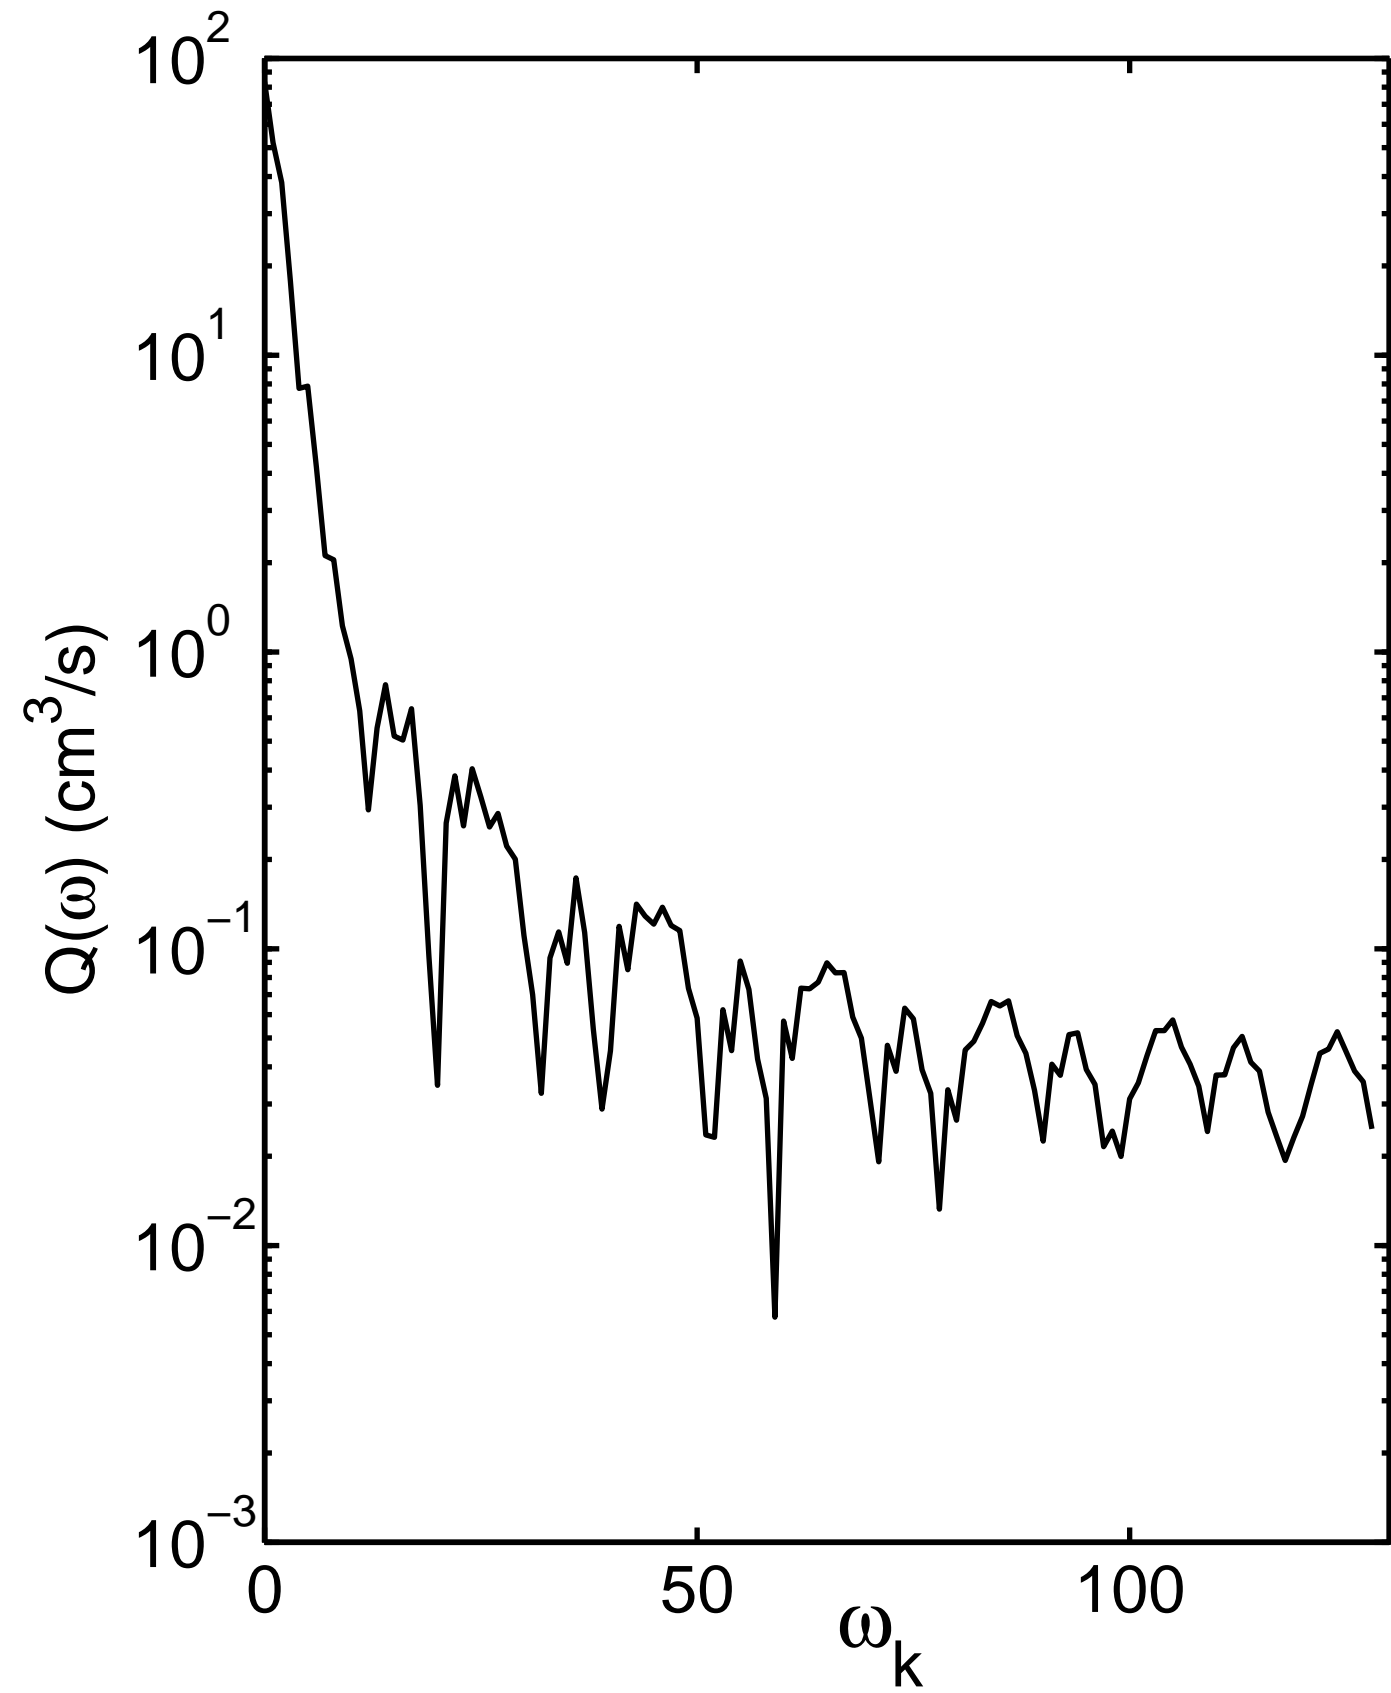

Supplement: pone.0128597.s004.pdf [file pone.0128597.s004.pdf]
